# Supplementary material
Source: MDPI journal article supplement (https://www.mdpi.com/2311-5637/10/3/134)
Supplement: s1 [file s1]

Title: Biogas Upgrading by Wild Alkaliphilic Microalgae and Application Potential of Their Biomass in the Carbon Capture and Utilization Technology

Authors: Yuri Kikuchi, Daichi Kanai, Kenjiro Sugiyama, and Katsuhiko Fujii

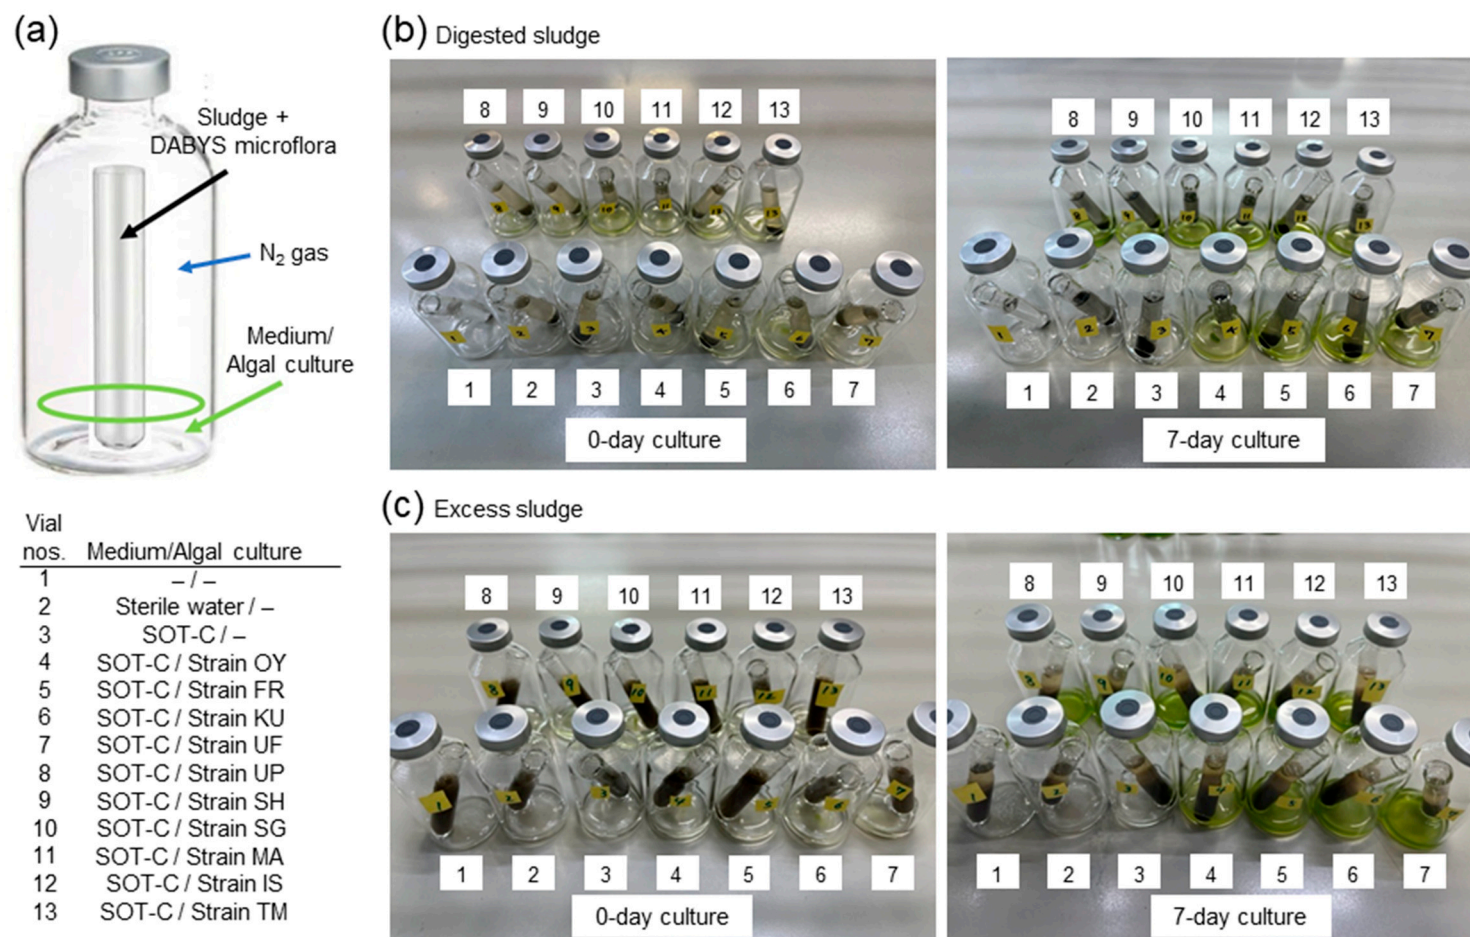

**Figure S1.** Outline of the biogas upgrading assay (a) and photographs of algal growth observed in the tested glass vials in which a small test tube dispensed with DABYS microflora and digested sludge (b) or excess sludge (c).
